# Supplementary material for: Growth of submillimeter SrTaO2N single crystals by an NH3-assisted SrCl2 flux method
Source: Royal Society of Chemistry journal article supplement (doi:10.1039/d3dt01383a), 2023-01-01
Supplement: d3dt01383a1.pdf [file d3dt01383a1.pdf]

## Supporting information

### Growth of Submillimeter SrTaO<sub>2</sub>N Single Crystals by an NH<sub>3</sub>-Assisted SrCl<sub>2</sub> Flux Method

*Ginji Harada,<sup>1</sup> Ryosuke Sinmyo,<sup>2</sup> Shuhou Maitani,<sup>2</sup> Tomoaki Watanabe,<sup>1</sup> Mirabbos Hojamberdiev,<sup>3</sup> Kitaru Suzuki,<sup>1</sup> and Hajime Wagata<sup>1\*</sup>*

*<sup>1</sup> Department of Applied Chemistry, School of Science and Technology, Meiji University, Kawasaki 214-8571, Japan*

*<sup>2</sup> Department of Physics, School of Science and Technology, Meiji University, Kawasaki 214-8571, Japan*

*<sup>3</sup> Institut für Chemie, Technische Universität Berlin, Straße des 17. Juni 135, 10623, Berlin, Germany*

Tel.: +81-44-934-7208

Fax: +81-44-934-7906

*\*E-mail address of corresponding author: [wagata@meiji.ac.jp](mailto:wagata@meiji.ac.jp)*

**Table S1. Synthesis conditions and crystal sizes of SrTaO<sub>2</sub>N crystals reported in various literatures.**

| Synthesis method                                        | Raw Material                                                                    | Temp. Atmosphere          | Crystal size                           | Remark                                                                                      | Ref.         |
|---------------------------------------------------------|---------------------------------------------------------------------------------|---------------------------|----------------------------------------|---------------------------------------------------------------------------------------------|--------------|
| Reactive inorganic vapor deposition method              | SrCO <sub>3</sub><br>SrCl <sub>2</sub> ·6H <sub>2</sub> O                       | 950°C<br>NH <sub>3</sub>  | 25 μm<br>× 0.5 cm<br>× 1 cm            | Epitaxial layer on LiTaO <sub>3</sub> single crystals                                       | <sup>1</sup> |
| Nitridation                                             | SrCl <sub>2</sub> -flux-grown<br>Sr <sub>2</sub> Ta <sub>2</sub> O <sub>7</sub> | 950°C<br>NH <sub>3</sub>  | 25 μm<br>(Max.)                        | Porous polycrystal                                                                          | <sup>2</sup> |
| Topotactic nitridation                                  | SrCl <sub>2</sub> -flux-grown<br>Sr <sub>2</sub> Ta <sub>2</sub> O <sub>7</sub> | 950°C<br>NH <sub>3</sub>  | 300 nm<br>×198 nm<br>× 30 nm<br>(Avg.) | Single crystal                                                                              | <sup>3</sup> |
| BaCN <sub>2</sub> flux method                           | BaCN <sub>2</sub><br>SrTaO <sub>2</sub> N                                       | 900°C<br>N <sub>2</sub>   | 3.7 μm<br>(Max.)                       | Single crystal<br>Sr <sub>1-x</sub> Ba <sub>x</sub> TaO <sub>2</sub> N<br>(0.04 ≤ x ≤ 0.23) | <sup>4</sup> |
| One pot flux assisted nitridation                       | Ta <sub>2</sub> O <sub>5</sub> , SrCl <sub>2</sub> ,<br>NaOH                    | 950°C<br>NH <sub>3</sub>  | 124 nm<br>(Avg.)                       | Single crystal                                                                              | <sup>5</sup> |
| NH <sub>3</sub> -assisted SrCl <sub>2</sub> flux method | Ta <sub>2</sub> O <sub>5</sub> , SrCl <sub>2</sub>                              | 1200°C<br>NH <sub>3</sub> | 300 μm<br>(Max.)                       | Single crystal                                                                              | This work    |

**Table S2. Experimental conditions for SrCl<sub>2</sub> flux growth of SrTaO<sub>2</sub>N crystals.**

| Run No. | Holding temp. /°C | Holding time /h | Cooling rate /°C·h <sup>-1</sup> | Solute                            | Flux & Solute        | Solute       |
|---------|-------------------|-----------------|----------------------------------|-----------------------------------|----------------------|--------------|
|         |                   |                 |                                  | Ta <sub>2</sub> O <sub>5</sub> /g | SrCl <sub>2</sub> /g | conc. (mol%) |
| 1       | 1200              | 10              | 150                              | 0.2443                            | 5.7557               | 1.5          |
| 2       | 1150              | 10              | 150                              | 0.2443                            | 5.7557               | 1.5          |
| 3       | 1050              | 10              | 150                              | 0.2443                            | 5.7557               | 1.5          |
| 4       | 950               | 10              | 150                              | 0.2443                            | 5.7557               | 1.5          |
| 5       | 850               | 10              | 150                              | 0.2443                            | 5.7557               | 1.5          |
| 6       | 750               | 10              | 150                              | 0.2443                            | 5.7557               | 1.5          |
| 7       | 650               | 10              | 150                              | 0.2443                            | 5.7557               | 1.5          |
| 8       | 1200              | 1               | 150                              | 0.2443                            | 5.7557               | 1.5          |
| 9       | 1200              | 0               | 150                              | 0.2443                            | 5.7557               | 1.5          |
| 10      | 1200              | 10              | 15                               | 0.2443                            | 5.7557               | 1.5          |
| 11      | 1200              | 10              | 150                              | 0.1643                            | 5.8357               | 1            |
| 12      | 1200              | 10              | 150                              | 0.4762                            | 5.5238               | 3            |
| 13      | 1200              | 10              | 150                              | 0.9063                            | 5.0937               | 6            |
| 14      | 1200              | 10              | 150                              | 2.4642                            | 3.5358               | 20           |
| 15      | 950               | 0               | 150                              | 0.2443                            | 5.7557               | 1.5          |
| 16      | 850               | 0               | 150                              | 0.2443                            | 5.7557               | 1.5          |
| 17      | 750               | 0               | 150                              | 0.2443                            | 5.7557               | 1.5          |

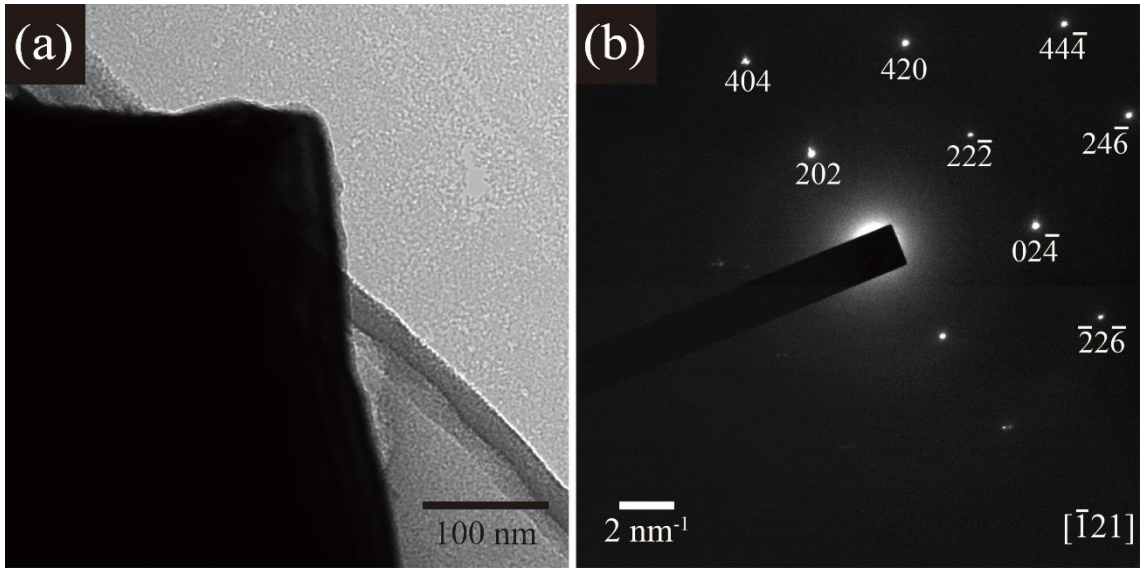

**Figure S1. (a) Bright field TEM image and (b) SAED patterns of pulverized SrTaO<sub>2</sub>N crystals grown by the NH<sub>3</sub>-assisted SrCl<sub>2</sub> flux method (Run No.1).**

EDX was performed in order to investigate the chemical compositions of the flux-grown SrTaO<sub>2</sub>N crystals (Figure S1). Peaks of nitrogen (N), oxygen (O), tantalum (Ta), and strontium (Sr) were attributed to SrTaO<sub>2</sub>N, peaks of carbon (C) and gold (Au) were attributed to carbon tape and gold sputtering for measurements, and an unidentified peak was caused by a sample chamber or a sample holder because it appeared at any cases.

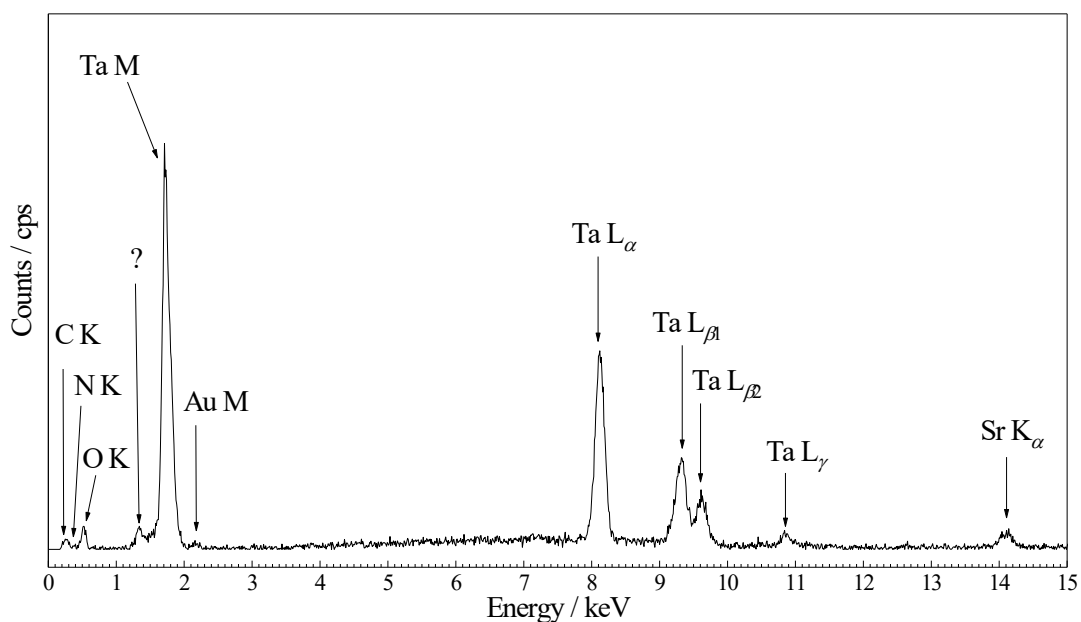

**Figure S2. EDX spectrum of crystals grown by an NH<sub>3</sub>-assisted SrCl<sub>2</sub> flux method (Run No. 1).**

The atomic ratio of Sr and Ta in the flux-grown SrTaO<sub>2</sub>N crystals (Run No. 1) is given as Sr:Ta = 1.0:1.0 from the EDX spectrum (Figure S1). If we assume that oxidation states of all tantalum cations are five (Ta<sup>5+</sup>) in the SrTaO<sub>2</sub>N crystal, its chemical formula is expressed as SrTaO<sub>3.5-1.5y</sub>N<sub>y</sub>, where y is nitrogen content in oxynitride and 3.5-1.5y is oxygen content, considering electrical neutrality. A chemical reaction formula during TG-DTA measurement is expressed as below because the sample

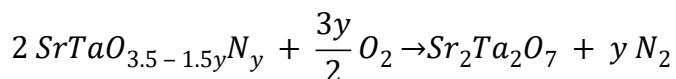

after TG-DTA analysis

was identified as Sr<sub>2</sub>Ta<sub>2</sub>O<sub>7</sub> without any impurities.

Since increment of the mass of the sample after TG-DTA is relevant to the mass of nitrogen released

$$y = \left( \frac{\Delta m}{3/2 M(\text{O}_2) - M(\text{N}_2)} \right) \times \frac{M(\text{Sr}_2\text{Ta}_2\text{O}_7)}{m(\text{Sr}_2\text{Ta}_2\text{O}_7)}$$

from the sample, nitrogen

(1)

content y in SrTaO<sub>3.5-1.5y</sub>N<sub>y</sub> can be calculated from following formula (1):

where Δm is total mass change, M(O<sub>2</sub>) and M(N<sub>2</sub>) are molecular weights of oxygen (O<sub>2</sub>) and nitrogen (N<sub>2</sub>), m(Sr<sub>2</sub>Ta<sub>2</sub>O<sub>7</sub>) is mass of the sample after TG-DTA, M(Sr<sub>2</sub>Ta<sub>2</sub>O<sub>7</sub>) is formula weight of Sr<sub>2</sub>Ta<sub>2</sub>O<sub>7</sub>. The total mass change Δm was calculated from the difference between mass at 400°C in the TG-DTA curve and that after the TG-DTA measurement, which is caused by transformation of SrTaO<sub>2</sub>N to Sr<sub>2</sub>Ta<sub>2</sub>O<sub>7</sub> as the above chemical formula. Since Δm is 1.83 mg and m(Sr<sub>2</sub>Ta<sub>2</sub>O<sub>7</sub>) is 51.31 mg, y is calculated to be 1.16. Therefore, chemical formula of the flux-grown SrTaO<sub>2</sub>N crystal is “SrTaO<sub>1.76</sub>N<sub>1.16</sub>”.

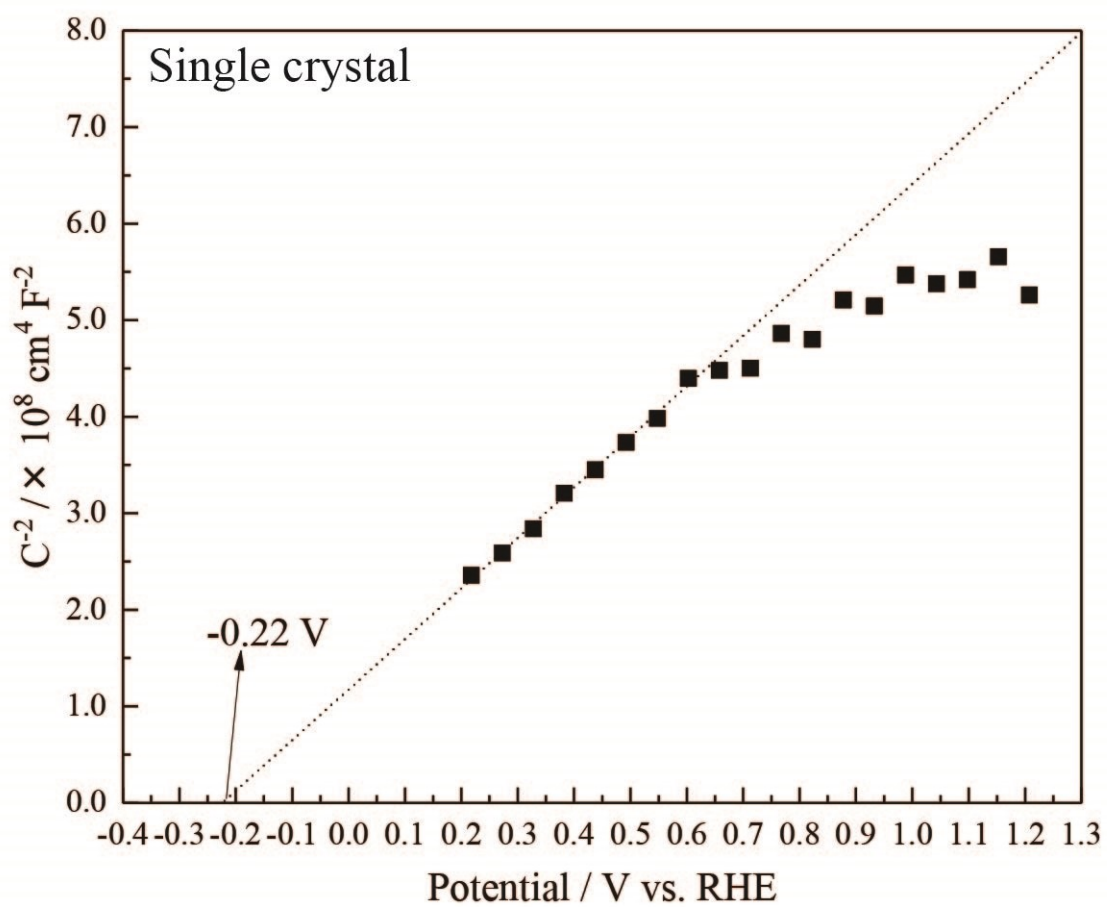

Figure S3. Mott-Schottky measurements of a  $\text{SrTaO}_2\text{N}$  single crystal grown by the  $\text{NH}_3$ -assisted  $\text{SrCl}_2$  flux method (Run No.1).

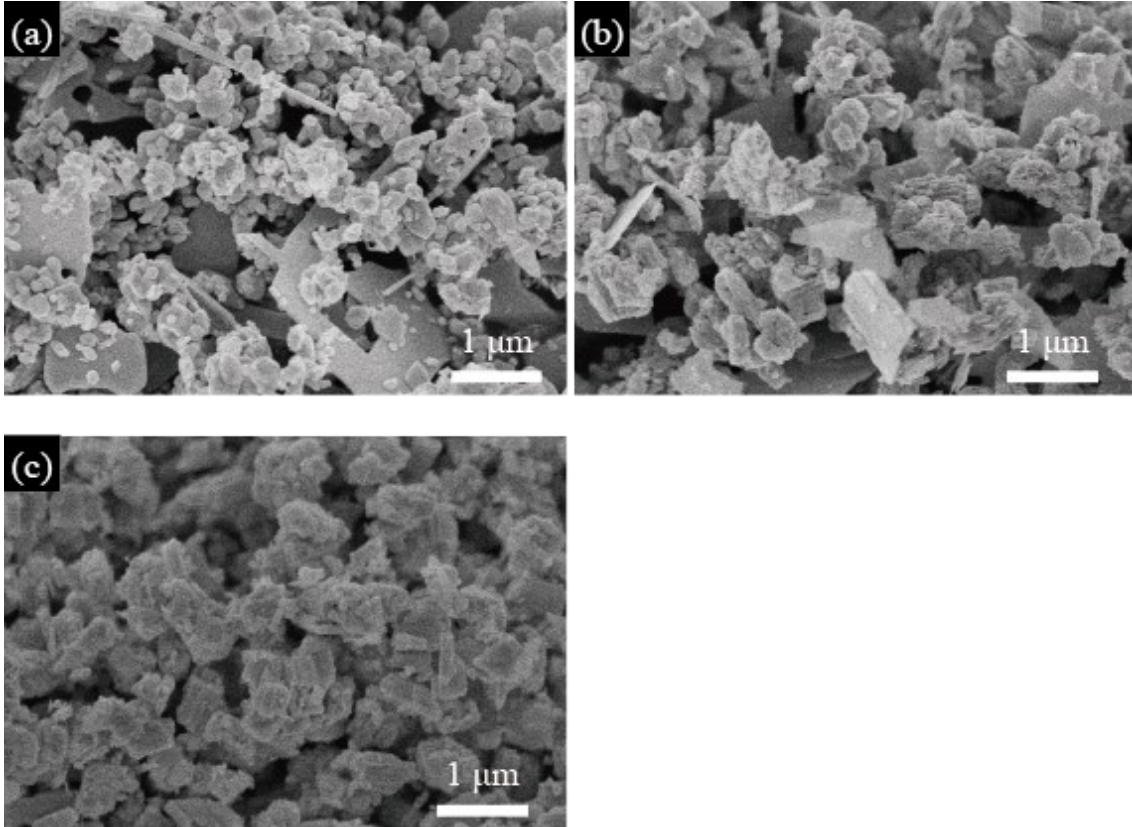

**Figure S4.** SEM images of samples prepared by the  $\text{NH}_3$ -assisted  $\text{SrCl}_2$  flux method at holding temperatures of (a)  $850^\circ\text{C}$ , (b)  $750^\circ\text{C}$ , and (c)  $650^\circ\text{C}$  for 10 h with a solute concentration of 1.5 mol% and a cooling rate of  $150^\circ\text{C h}^{-1}$  (Run Nos. 5–7).



Flux evaporation ratio (evap %) was calculated using the following formula:

$$\begin{aligned}
 \text{evap (\%)} &= \frac{m_{\text{SrCl}_2, \text{Evap}}}{m_{\text{SrCl}_2, \text{B}}} \times 100 \\
 &= \frac{m_{\text{SrCl}_2, \text{B}} - m_{\text{SrCl}_2, \text{A}}}{m_{\text{SrCl}_2, \text{B}}} \times 100 \\
 &= \frac{m_{\text{SrCl}_2, \text{B}} - (m_{\text{all}, \text{A}} - m_{\text{SrTaO}_2\text{N}})}{m_{\text{SrCl}_2, \text{B}}} \times 100 \tag{S1}
 \end{aligned}$$

where  $m_{\text{SrCl}_2, \text{Evap}}$  is mass of  $\text{SrCl}_2$  flux evaporated during the reaction,  $m_{\text{SrCl}_2, \text{B}}$  is mass of  $\text{SrCl}_2$  flux before the reaction,  $m_{\text{SrCl}_2, \text{A}}$  is mass of  $\text{SrCl}_2$  flux after the reaction,  $m_{\text{all}, \text{A}}$  is mass of all samples including  $\text{SrCl}_2$  flux and product ( $\text{SrTaO}_2\text{N}$ ) after the reaction,  $m_{\text{SrTaO}_2\text{N}}$  is mass of resulting product ( $\text{SrTaO}_2\text{N}$ ) after the reaction.

All the masses were measured by a precision valance (XS205, METTLER TOLEDO) with an accuracy of 0.01 mg.  $m_{\text{SrCl}_2, \text{B}}$  is measured from amount of  $\text{SrCl}_2$  before mixing.  $m_{\text{all}, \text{A}}$  is calculated by subtracting the mass of the platinum boat from the total mass of the sample and the platinum boat after the reaction.  $m_{\text{SrTaO}_2\text{N}}$  is measured from amount of the obtained crystals.

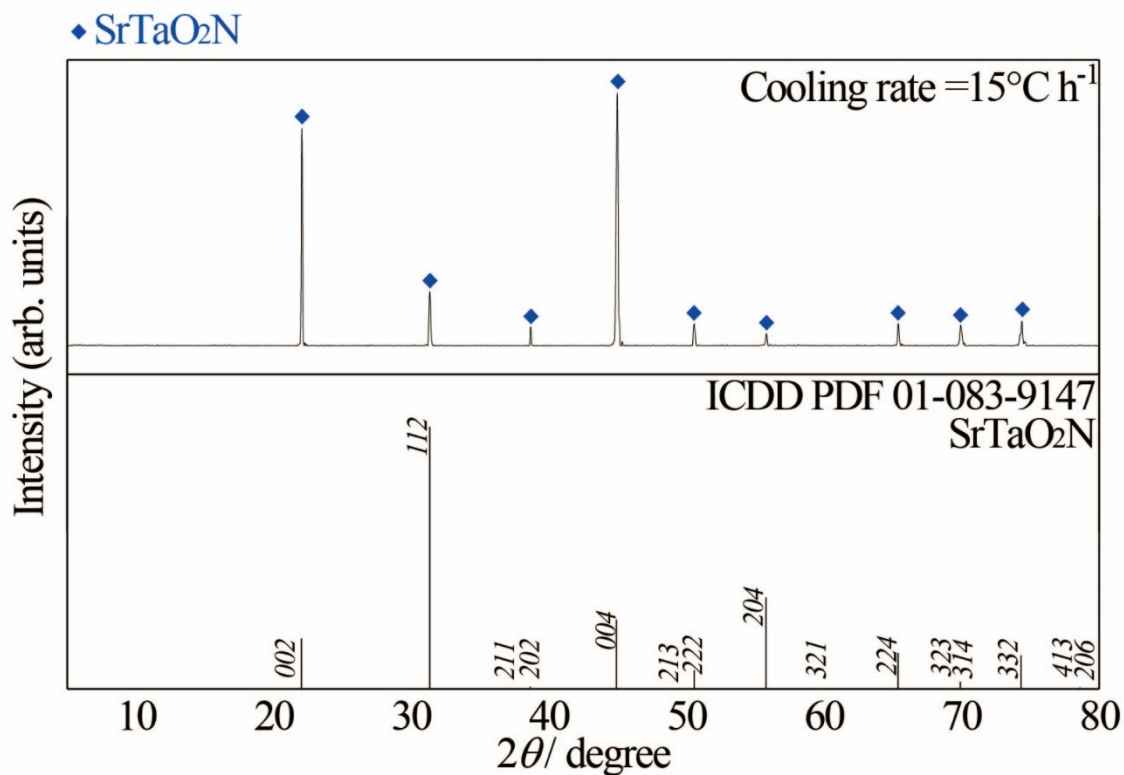

Figure S5. XRD patterns of pulverized crystals grown by the NH<sub>3</sub>-assisted SrCl<sub>2</sub> flux method at a holding temperature of 1200°C for 10 h with a solute concentration of 1.5 mol% and a cooling rate of 15°C h<sup>-1</sup> (Run No.10). The XRD pattern of tetragonal SrTaO<sub>2</sub>N (ICDD PDF 01-083-9147) is shown for reference.

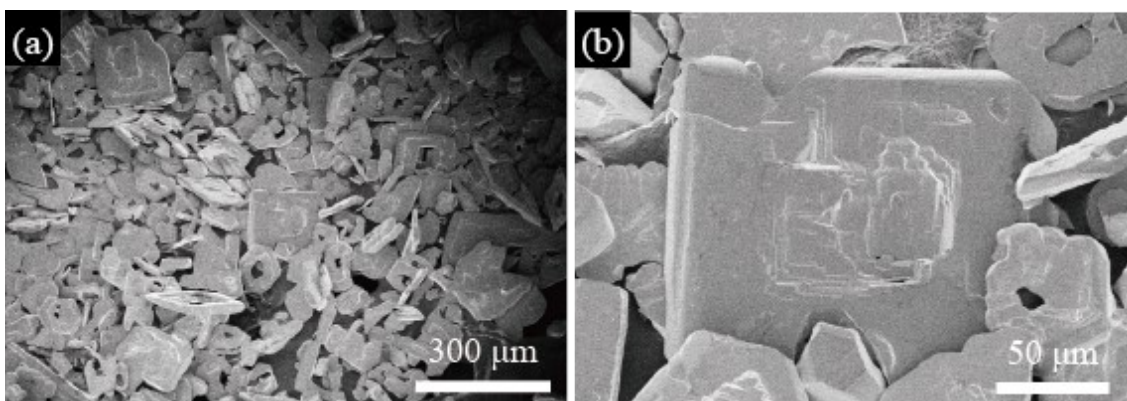

Figure S6. Low- and high-magnification SEM images of samples prepared by the NH<sub>3</sub>-assisted SrCl<sub>2</sub> flux method at a holding temperature of 1200°C for 10 h with a solute concentration of 1.5 mol% at a cooling rate of 15°C h<sup>-1</sup> (Run No.10).

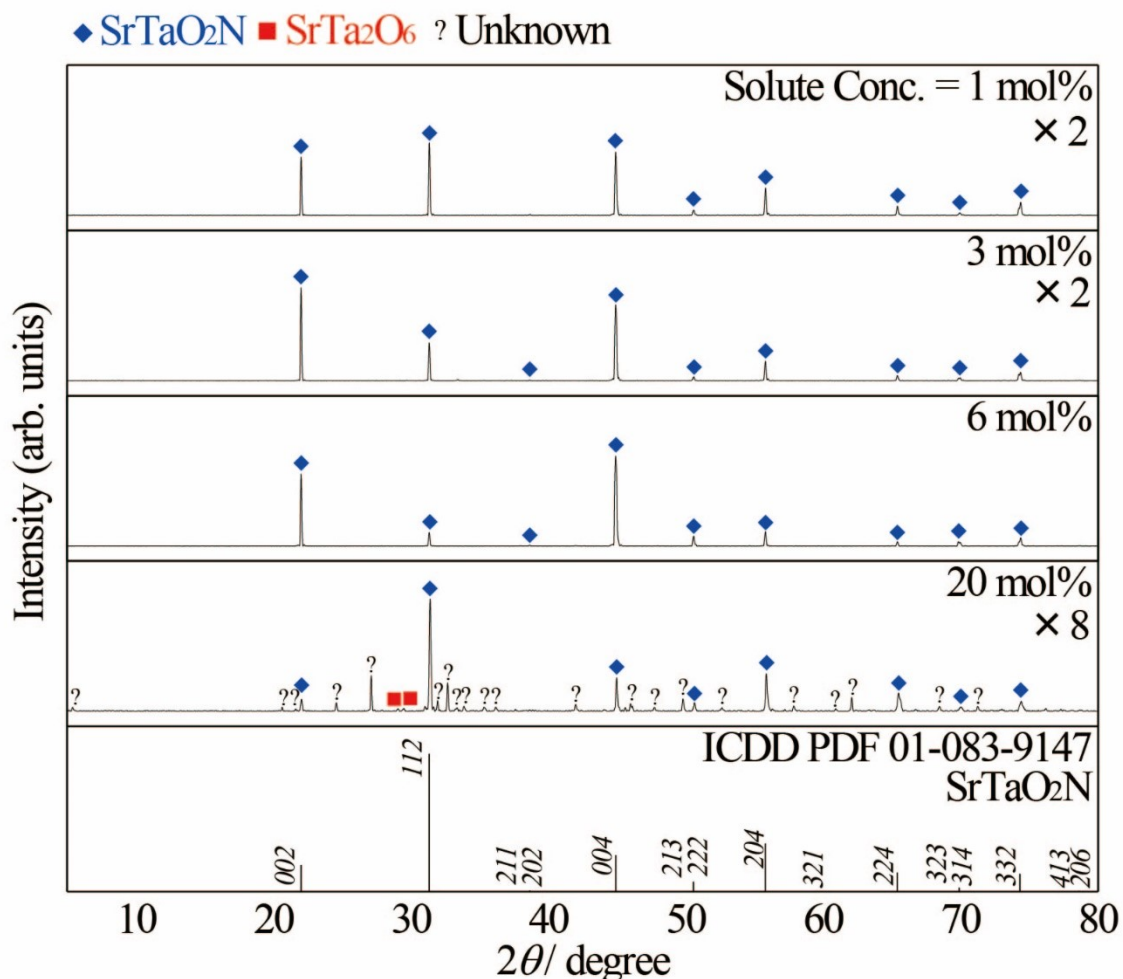

Figure S7. XRD patterns of pulverized crystals grown by the NH<sub>3</sub>-assisted SrCl<sub>2</sub> flux method at a holding temperature of 1200°C for 10 h with various solute concentrations at a cooling rate of 150°C h<sup>-1</sup> (Run Nos. 11–14). The XRD pattern of tetragonal SrTaO<sub>2</sub>N (ICDD PDF 01-083-9147) is shown for reference.

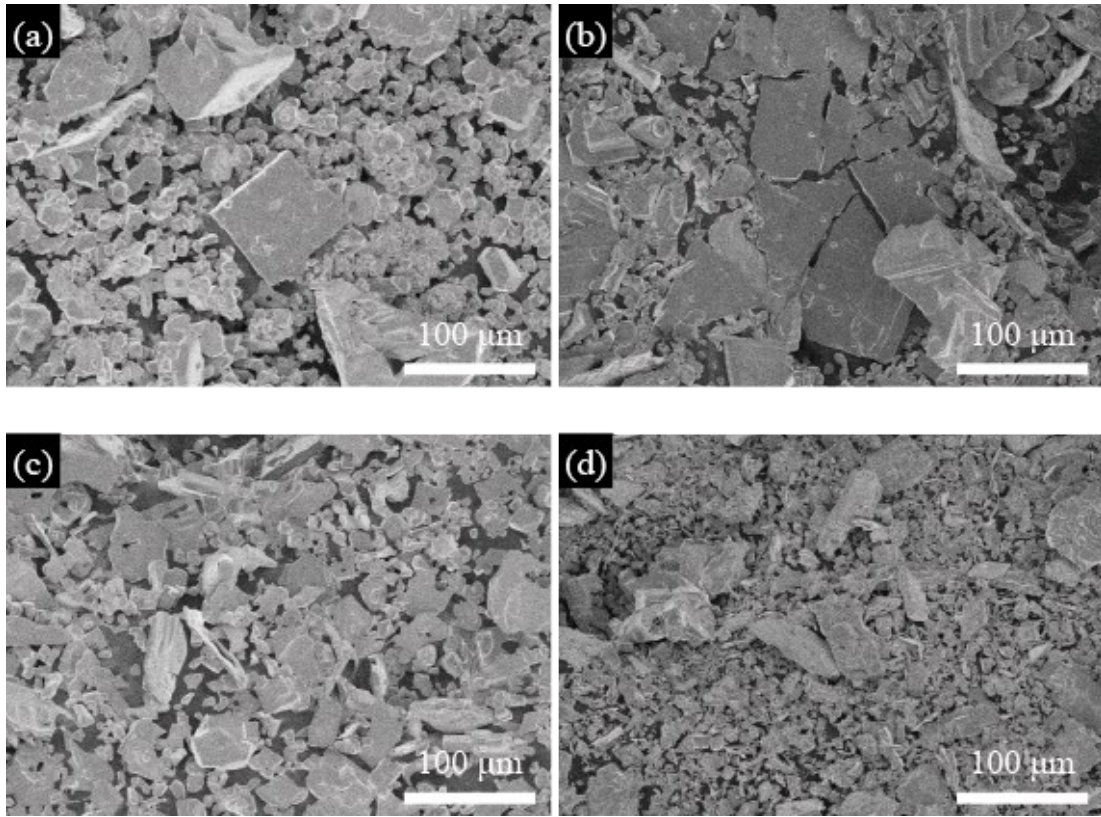

**Figure S8.** SEM images of samples prepared by the NH<sub>3</sub>-assisted SrCl<sub>2</sub> flux method at holding temperature of 1200°C for 10 h with solute concentrations of (a) 1 mol%, (b) 3 mol%, (c) 6 mol%, and (d) 20 mol% and a cooling rate of 150°C h<sup>-1</sup> (Run Nos. 11–14).

## REFERENCES

1. X. M. Xu, W. J. Wang, Y. M. Zhang, Y. Chen, H. T. Huang, T. Fang, Y. Li, Z. S. Li and Z. G. Zou, *Science Bulletin*, 2022, **67**, 1458-1466.
2. Y. Mizuno, H. Wagata, K. Yubuta, N. Zettsu, S. Oishi and K. Teshima, *Crystengcomm*, 2013, **15**, 8133-8138.
3. J. Fu and S. E. Skrabalak, *Angewandte Chemie International Edition*, 2017, **56**, 14169-14173.
4. A. Hosono, Y. Masubuchi, T. Endo and S. Kikkawa, *Dalton Transactions*, 2017, **46**, 16837-16844.
5. K. Chen, J. Xiao, J. J. M. Vequizo, T. Hisatomi, Y. Ma, M. Nakabayashi, T. Takata, A. Yamakata, N. Shibata and K. Domen, *Journal of the American Chemical Society*, 2023, **145**, 3839–3843.
